# Supplementary material
Source: PubMed Central journal article supplement (PMC9036548)
Supplement: NIHMS1799409-supplement-Supplement.pdf [file NIHMS1799409-supplement-Supplement.pdf]

## Appendix 1. Results of literature review of pediatric cancer registries from 2018-2020

Article: "Using Big Data in Pediatric Oncology: Current Applications and Future Directions"

Authors: Ajay Major, MD, MBA, Suzanne M. Cox, PhD, MPH, Samuel L. Volchenbom, MD, PhD, University of Chicago

Journal: Seminars in Oncology, February 2020.

<https://doi.org/10.1053/j.seminoncol.2020.02.006>

| Registry                                    | Tumor Types                 | Geographical Areas Represented     | Citation                                                                                                |
|---------------------------------------------|-----------------------------|------------------------------------|---------------------------------------------------------------------------------------------------------|
| <b>Descriptive Epidemiological Studies</b>  |                             |                                    |                                                                                                         |
| SIOP-WT-2001 Registry                       | Wilms tumor                 | Europe                             | <a href="https://www.ncbi.nlm.nih.gov/pubmed/29693799">https://www.ncbi.nlm.nih.gov/pubmed/29693799</a> |
| SIOP-WT-2001 Registry                       | Wilms tumor                 | Europe                             | <a href="https://www.ncbi.nlm.nih.gov/pubmed/31163337">https://www.ncbi.nlm.nih.gov/pubmed/31163337</a> |
| Madras Metropolitan Tumor Registry          | hepatoblastoma              | India                              | <a href="https://www.ncbi.nlm.nih.gov/pubmed/28963691">https://www.ncbi.nlm.nih.gov/pubmed/28963691</a> |
| Turkish Pediatric Bone Marrow Registry      | lymphoma / HSCT             | Turkey                             | <a href="https://www.ncbi.nlm.nih.gov/pubmed/28571522">https://www.ncbi.nlm.nih.gov/pubmed/28571522</a> |
| Italian Pediatric Rare Tumor Registry       | pancreatic tumors (SPPT)    | Italy                              | <a href="https://www.ncbi.nlm.nih.gov/pubmed/30362240">https://www.ncbi.nlm.nih.gov/pubmed/30362240</a> |
| SIOP, GPOH, EU-RHAB                         | the kidney                  | Austria, Switzerland, and Germany  | <a href="https://www.ncbi.nlm.nih.gov/pubmed/28843054">https://www.ncbi.nlm.nih.gov/pubmed/28843054</a> |
| Swiss Blood Stem Cell Transplantation Group | HSCT                        | Switzerland                        | <a href="https://www.ncbi.nlm.nih.gov/pubmed/29493715">https://www.ncbi.nlm.nih.gov/pubmed/29493715</a> |
| Sarcoma Studies (EICESS-92) and Euro-       | Ewing sarcoma               | Europe                             | <a href="https://www.ncbi.nlm.nih.gov/pubmed/30244879">https://www.ncbi.nlm.nih.gov/pubmed/30244879</a> |
| National Cancer Database                    | intracranial germinoma      | United States                      | <a href="https://www.ncbi.nlm.nih.gov/pubmed/29177595">https://www.ncbi.nlm.nih.gov/pubmed/29177595</a> |
| National Cancer Database                    | Hodgkin lymphoma            | United States                      | <a href="https://www.ncbi.nlm.nih.gov/pubmed/30605220">https://www.ncbi.nlm.nih.gov/pubmed/30605220</a> |
| Rare Tumors (EXPeRT)                        | melanoma                    | Italy, Poland, Germany, and France | <a href="https://www.ncbi.nlm.nih.gov/pubmed/29350487">https://www.ncbi.nlm.nih.gov/pubmed/29350487</a> |
| Information System (POGONIS)                | all pediatric cancer        | Canada                             | <a href="https://www.ncbi.nlm.nih.gov/pubmed/29473334">https://www.ncbi.nlm.nih.gov/pubmed/29473334</a> |
| Oncology DIPG Registries                    | glioma                      | international                      | <a href="https://www.ncbi.nlm.nih.gov/pubmed/29746225">https://www.ncbi.nlm.nih.gov/pubmed/29746225</a> |
| Florida Cancer Data System                  | skin cancer                 | Florida                            | <a href="https://www.ncbi.nlm.nih.gov/pubmed/29999198">https://www.ncbi.nlm.nih.gov/pubmed/29999198</a> |
| SEER                                        | hepatoblastoma and HCC      | United States                      | <a href="https://www.ncbi.nlm.nih.gov/pubmed/28617762">https://www.ncbi.nlm.nih.gov/pubmed/28617762</a> |
| SEER                                        | all pediatric cancer        | United States                      | <a href="https://www.ncbi.nlm.nih.gov/pubmed/30256525">https://www.ncbi.nlm.nih.gov/pubmed/30256525</a> |
| SEER                                        | optic pathway glioma        | United States                      | <a href="https://www.ncbi.nlm.nih.gov/pubmed/29684801">https://www.ncbi.nlm.nih.gov/pubmed/29684801</a> |
| SEER                                        | optic pathway glioma        | United States                      | <a href="https://www.ncbi.nlm.nih.gov/pubmed/29684801">https://www.ncbi.nlm.nih.gov/pubmed/29684801</a> |
| SEER                                        | neuroectodermal tumors (BS- | United States                      | <a href="https://www.ncbi.nlm.nih.gov/pubmed/29299687">https://www.ncbi.nlm.nih.gov/pubmed/29299687</a> |
| SEER                                        | Merkel cell carcinoma       | United States                      | <a href="https://www.ncbi.nlm.nih.gov/pubmed/30165170">https://www.ncbi.nlm.nih.gov/pubmed/30165170</a> |
| SEER                                        | pineoblastomas              | United States                      | <a href="https://www.ncbi.nlm.nih.gov/pubmed/31104125">https://www.ncbi.nlm.nih.gov/pubmed/31104125</a> |
| SEER                                        | melanoma                    | United States                      | <a href="https://www.ncbi.nlm.nih.gov/pubmed/29602554">https://www.ncbi.nlm.nih.gov/pubmed/29602554</a> |
| SEER                                        | ependymomas                 | United States                      | <a href="https://www.ncbi.nlm.nih.gov/pubmed/29631082">https://www.ncbi.nlm.nih.gov/pubmed/29631082</a> |
| SEER                                        | pineoblastomas              | United States                      | <a href="https://www.ncbi.nlm.nih.gov/pubmed/30031180">https://www.ncbi.nlm.nih.gov/pubmed/30031180</a> |

| Registry                                                                                                                                       | Tumor Types             | Geographical Areas Represented | Citation                                                                                                |
|------------------------------------------------------------------------------------------------------------------------------------------------|-------------------------|--------------------------------|---------------------------------------------------------------------------------------------------------|
| SEER                                                                                                                                           | appendiceal tumors      | United States                  | <a href="https://www.ncbi.nlm.nih.gov/pubmed/29656783">https://www.ncbi.nlm.nih.gov/pubmed/29656783</a> |
| SEER                                                                                                                                           | soft tissue sarcomas    | United States                  | <a href="https://www.ncbi.nlm.nih.gov/pubmed/31028942">https://www.ncbi.nlm.nih.gov/pubmed/31028942</a> |
| SEER                                                                                                                                           | hepatoblastoma          | United States                  | <a href="https://www.ncbi.nlm.nih.gov/pubmed/31584686">https://www.ncbi.nlm.nih.gov/pubmed/31584686</a> |
| SEER                                                                                                                                           | ependymoma              | United States                  | <a href="https://www.ncbi.nlm.nih.gov/pubmed/29115718">https://www.ncbi.nlm.nih.gov/pubmed/29115718</a> |
| Nebraska Cancer Registry                                                                                                                       | all pediatric cancer    | Nebraska                       | <a href="https://www.ncbi.nlm.nih.gov/pubmed/29278840">https://www.ncbi.nlm.nih.gov/pubmed/29278840</a> |
| Jordan Cancer Registry                                                                                                                         | all pediatric cancer    | Jordan                         | <a href="https://www.ncbi.nlm.nih.gov/pubmed/30215479">https://www.ncbi.nlm.nih.gov/pubmed/30215479</a> |
| Neurofibromatosis Registry                                                                                                                     | sheath tumor            | international                  | <a href="https://www.ncbi.nlm.nih.gov/pubmed/29683959">https://www.ncbi.nlm.nih.gov/pubmed/29683959</a> |
| Danish Childhood Cancer Registry                                                                                                               | head and neck           | Denmark                        | <a href="https://www.ncbi.nlm.nih.gov/pubmed/30578994">https://www.ncbi.nlm.nih.gov/pubmed/30578994</a> |
| Danish Cancer Registry                                                                                                                         | head and neck           | Denmark                        | <a href="https://www.ncbi.nlm.nih.gov/pubmed/29603576">https://www.ncbi.nlm.nih.gov/pubmed/29603576</a> |
| Colorado Central Cancer Registry                                                                                                               | melanoma                | Colorado                       | <a href="https://www.ncbi.nlm.nih.gov/pubmed/30793788">https://www.ncbi.nlm.nih.gov/pubmed/30793788</a> |
| Finnish Cancer Registry                                                                                                                        | pediatric liver cancers | Finland                        | <a href="https://www.ncbi.nlm.nih.gov/pubmed/31350767">https://www.ncbi.nlm.nih.gov/pubmed/31350767</a> |
| Finnish Cancer Registry                                                                                                                        | all pediatric cancer    | Finland                        | <a href="https://www.ncbi.nlm.nih.gov/pubmed/29863418">https://www.ncbi.nlm.nih.gov/pubmed/29863418</a> |
| Finnish Cancer Registry                                                                                                                        | all pediatric cancer    | Finland                        | <a href="https://www.ncbi.nlm.nih.gov/pubmed/31407318">https://www.ncbi.nlm.nih.gov/pubmed/31407318</a> |
| Canadian Cancer Registry                                                                                                                       | all pediatric cancer    | Canada                         | <a href="https://www.ncbi.nlm.nih.gov/pubmed/29537768">https://www.ncbi.nlm.nih.gov/pubmed/29537768</a> |
| Canadian Cancer Registry                                                                                                                       | leukemia                | Canada                         | <a href="https://www.ncbi.nlm.nih.gov/pubmed/31103934">https://www.ncbi.nlm.nih.gov/pubmed/31103934</a> |
| Canadian Cancer Registry                                                                                                                       | retinoblastoma          | Canada                         | <a href="https://www.ncbi.nlm.nih.gov/pubmed/30889267">https://www.ncbi.nlm.nih.gov/pubmed/30889267</a> |
| Canadian Cancer Registry                                                                                                                       | brain tumors            | Canada                         | <a href="https://www.ncbi.nlm.nih.gov/pubmed/30649461">https://www.ncbi.nlm.nih.gov/pubmed/30649461</a> |
| Korea Central Cancer Registry                                                                                                                  | brain tumor             | Korea                          | <a href="https://www.ncbi.nlm.nih.gov/pubmed/30348678">https://www.ncbi.nlm.nih.gov/pubmed/30348678</a> |
| Korea Central Cancer Registry                                                                                                                  | lymphoid cancers        | Korea                          | <a href="https://www.ncbi.nlm.nih.gov/pubmed/28361523">https://www.ncbi.nlm.nih.gov/pubmed/28361523</a> |
| Swedish Cancer Registry                                                                                                                        | soft tissue sarcoma     | Switzerland                    | <a href="https://www.ncbi.nlm.nih.gov/pubmed/30980537">https://www.ncbi.nlm.nih.gov/pubmed/30980537</a> |
| Texas Cancer Registry                                                                                                                          | sarcoma                 | Texas                          | <a href="https://www.ncbi.nlm.nih.gov/pubmed/30096005">https://www.ncbi.nlm.nih.gov/pubmed/30096005</a> |
| Texas Cancer Registry                                                                                                                          | melanoma                | Texas                          | <a href="https://www.ncbi.nlm.nih.gov/pubmed/30729662">https://www.ncbi.nlm.nih.gov/pubmed/30729662</a> |
| Rhode Island Cancer Registry                                                                                                                   | all pediatric cancer    | Rhode Island                   | <a href="https://www.ncbi.nlm.nih.gov/pubmed/30709075">https://www.ncbi.nlm.nih.gov/pubmed/30709075</a> |
| AIEOP-OTR registry                                                                                                                             | all pediatric cancer    | Italy                          | <a href="https://www.ncbi.nlm.nih.gov/pubmed/30772657">https://www.ncbi.nlm.nih.gov/pubmed/30772657</a> |
| Childhood Cancer Registry of CL (Spain) and the Spanish Childhood Cancer Registry of the Pediatric Oncohematology Spanish Society (RETI-SEHOP) | all pediatric cancer    | Spain                          | <a href="https://www.ncbi.nlm.nih.gov/pubmed/30313108">https://www.ncbi.nlm.nih.gov/pubmed/30313108</a> |
| EUROCOURSE                                                                                                                                     | Wilm's tumor            | Southern and Eastern Europe    | <a href="https://www.ncbi.nlm.nih.gov/pubmed/29655086">https://www.ncbi.nlm.nih.gov/pubmed/29655086</a> |
| EUROCOURSE and Nationwide Registry for Childhood Hematological Malignancies and Solid Tumors (NARECHEM-ST)                                     | neuroblastoma           | Southern and Eastern Europe    | <a href="https://www.ncbi.nlm.nih.gov/pubmed/29250786">https://www.ncbi.nlm.nih.gov/pubmed/29250786</a> |

| Registry                                                                                                   | Tumor Types                                | Geographical Areas Represented   | Citation                                                                                                                                        |
|------------------------------------------------------------------------------------------------------------|--------------------------------------------|----------------------------------|-------------------------------------------------------------------------------------------------------------------------------------------------|
| EUROCOURSE and Nationwide Registry for Childhood Hematological Malignancies and Solid Tumors (NARECHEM-ST) | Wilm's tumor                               | Southern and Eastern Europe      | <a href="https://www.ncbi.nlm.nih.gov/pubmed/30014973">https://www.ncbi.nlm.nih.gov/pubmed/30014973</a>                                         |
| Nationwide Registry for Childhood Hematological Malignancies and Solid Tumours (NARECHEM-ST)               | neuroblastoma                              | Southern and Eastern Europe      | <a href="https://www.ncbi.nlm.nih.gov/pubmed/29673989">https://www.ncbi.nlm.nih.gov/pubmed/29673989</a>                                         |
| Nationwide Registry for Childhood Hematological Malignancies and Solid Tumours (NARECHEM-ST)               | Wilm's tumor                               | Southern and Eastern Europe      | <a href="https://www.ncbi.nlm.nih.gov/pubmed/31082691">https://www.ncbi.nlm.nih.gov/pubmed/31082691</a>                                         |
| Swiss Childhood Cancer Registry                                                                            | all pediatric cancer                       | Switzerland                      | <a href="https://www.ncbi.nlm.nih.gov/pubmed/29442212">https://www.ncbi.nlm.nih.gov/pubmed/29442212</a>                                         |
| Cancer Registry of New Caledonia                                                                           | all pediatric cancer                       | New Caledonia                    | <a href="https://www.ncbi.nlm.nih.gov/pubmed/30044351">https://www.ncbi.nlm.nih.gov/pubmed/30044351</a>                                         |
| Taiwan Cancer Registry                                                                                     | hepatoblastoma                             | Taiwan                           | <a href="https://www.ncbi.nlm.nih.gov/pubmed/29459224">https://www.ncbi.nlm.nih.gov/pubmed/29459224</a>                                         |
| Transplantation                                                                                            | HCST                                       | Taiwan                           | <a href="https://www.ncbi.nlm.nih.gov/pubmed/30666432">https://www.ncbi.nlm.nih.gov/pubmed/30666432</a>                                         |
| Czech National Cancer Registry                                                                             | all pediatric cancer                       | Czech Republic                   | <a href="https://www.ncbi.nlm.nih.gov/pubmed/30064234">https://www.ncbi.nlm.nih.gov/pubmed/30064234</a>                                         |
| the 5 geographic regions in Brazil                                                                         | all pediatric cancer                       | Brazil                           | <a href="https://www.ncbi.nlm.nih.gov/pubmed/31013367">https://www.ncbi.nlm.nih.gov/pubmed/31013367</a>                                         |
| Turkey Pediatric Cancer Registry                                                                           | all pediatric cancer                       | Turkey                           | <a href="https://ascopubs.org/doi/abs/10.1200/JCO.2019.37.15_suppl.e21510">https://ascopubs.org/doi/abs/10.1200/JCO.2019.37.15_suppl.e21510</a> |
| Tumors                                                                                                     | all pediatric cancer                       | France                           | <a href="https://www.ncbi.nlm.nih.gov/pubmed/29770995">https://www.ncbi.nlm.nih.gov/pubmed/29770995</a>                                         |
| Tumors                                                                                                     | medulloblastoma                            | France                           | <a href="https://www.ncbi.nlm.nih.gov/pubmed/31504825">https://www.ncbi.nlm.nih.gov/pubmed/31504825</a>                                         |
| ESCALE and ESTELLE                                                                                         | brain tumors                               | France                           | <a href="https://www.ncbi.nlm.nih.gov/pubmed/29128708">https://www.ncbi.nlm.nih.gov/pubmed/29128708</a>                                         |
| ESCALE and ESTELLE                                                                                         | brain tumors                               | France                           | <a href="https://www.ncbi.nlm.nih.gov/pubmed/30697705">https://www.ncbi.nlm.nih.gov/pubmed/30697705</a>                                         |
| HIT-2000 trial and the HIT-2000 Interim Registry                                                           | primary metastatic intracranial ependymoma | Germany, Austria, or Switzerland | <a href="https://www.ncbi.nlm.nih.gov/pubmed/30850560">https://www.ncbi.nlm.nih.gov/pubmed/30850560</a>                                         |
| National Cancer Registry for England                                                                       | brain tumors                               | England                          | <a href="https://www.ncbi.nlm.nih.gov/pubmed/29724124">https://www.ncbi.nlm.nih.gov/pubmed/29724124</a>                                         |
| Pennsylvania Cancer Registry                                                                               | all pediatric cancer                       | Pennsylvania                     | <a href="https://www.ncbi.nlm.nih.gov/pubmed/31600095">https://www.ncbi.nlm.nih.gov/pubmed/31600095</a>                                         |
| Thai ALL Observational Registry under the supervision of the Thai Society of Hematology (NCR)              | ALL                                        | Thailand                         | <a href="https://www.ncbi.nlm.nih.gov/pubmed/31675661">https://www.ncbi.nlm.nih.gov/pubmed/31675661</a>                                         |
| Australian Childhood Cancer Registry                                                                       | pediatric solid cancer                     | Saudi Arabia                     | <a href="https://www.ncbi.nlm.nih.gov/pubmed/30803142">https://www.ncbi.nlm.nih.gov/pubmed/30803142</a>                                         |
| Australian Childhood Cancer Registry                                                                       | leukemia and lymphoma                      | Australia                        | <a href="https://www.ncbi.nlm.nih.gov/pubmed/30831553">https://www.ncbi.nlm.nih.gov/pubmed/30831553</a>                                         |
| Australian Childhood Cancer Registry                                                                       | leukemia and lymphoma                      | Australia                        | <a href="https://www.ncbi.nlm.nih.gov/pubmed/30803139">https://www.ncbi.nlm.nih.gov/pubmed/30803139</a>                                         |
| Girona Cancer Registry                                                                                     | brain tumors                               | Girona, Spain                    | <a href="https://www.ncbi.nlm.nih.gov/pubmed/30712237">https://www.ncbi.nlm.nih.gov/pubmed/30712237</a>                                         |
| CWS-SoTiSaR                                                                                                | (RMS)                                      | Europe                           | <a href="https://www.ncbi.nlm.nih.gov/pubmed/31610788">https://www.ncbi.nlm.nih.gov/pubmed/31610788</a>                                         |
| CWS-SoTiSaR                                                                                                | of the foot or ankle                       | Europe                           | <a href="https://www.ncbi.nlm.nih.gov/pubmed/30421433">https://www.ncbi.nlm.nih.gov/pubmed/30421433</a>                                         |

| Registry                                                                      | Tumor Types                           | Geographical Areas Represented                                    | Citation                                                                                                |
|-------------------------------------------------------------------------------|---------------------------------------|-------------------------------------------------------------------|---------------------------------------------------------------------------------------------------------|
| CWS-SoTiSaR                                                                   | sarcoma (LGFMS)                       | Europe                                                            | <a href="https://www.ncbi.nlm.nih.gov/pubmed/31736251">https://www.ncbi.nlm.nih.gov/pubmed/31736251</a> |
| CWS-SoTiSaR                                                                   | alveolar soft-part sarcoma            | Europe                                                            | <a href="https://www.ncbi.nlm.nih.gov/pubmed/30124238">https://www.ncbi.nlm.nih.gov/pubmed/30124238</a> |
| CWS-SoTiSaR                                                                   | cell tumors                           | Europe                                                            | <a href="https://www.ncbi.nlm.nih.gov/pubmed/30652419">https://www.ncbi.nlm.nih.gov/pubmed/30652419</a> |
| CWS-SoTiSaR                                                                   | epithelioid sarcoma                   | Europe                                                            | <a href="https://www.ncbi.nlm.nih.gov/pubmed/31215116">https://www.ncbi.nlm.nih.gov/pubmed/31215116</a> |
| CWS-SoTiSaR                                                                   | rhabdomyosarcoma                      | Europe                                                            | <a href="https://www.ncbi.nlm.nih.gov/pubmed/29464349">https://www.ncbi.nlm.nih.gov/pubmed/29464349</a> |
| CWS-SoTiSaR                                                                   | fibrosarcoma                          | Europe                                                            | <a href="https://www.ncbi.nlm.nih.gov/pubmed/31753608">https://www.ncbi.nlm.nih.gov/pubmed/31753608</a> |
| CWS-SoTiSaR                                                                   | rhabdomyosarcoma                      | Europe                                                            | <a href="https://www.ncbi.nlm.nih.gov/pubmed/30762282">https://www.ncbi.nlm.nih.gov/pubmed/30762282</a> |
| Italian Neuroblastoma Registry                                                | neuroblastoma                         | Italy                                                             | <a href="https://www.ncbi.nlm.nih.gov/pubmed/30634996">https://www.ncbi.nlm.nih.gov/pubmed/30634996</a> |
| Italian Neuroblastoma Registry                                                | neuroblastoma                         | Italy                                                             | <a href="https://www.ncbi.nlm.nih.gov/pubmed/31135717">https://www.ncbi.nlm.nih.gov/pubmed/31135717</a> |
| EBMT                                                                          | Wilm's tumor                          | Europe                                                            | <a href="https://www.ncbi.nlm.nih.gov/pubmed/31534191">https://www.ncbi.nlm.nih.gov/pubmed/31534191</a> |
| EBMT                                                                          | AML / ALL / HSCT                      | Europe                                                            | <a href="https://www.ncbi.nlm.nih.gov/pubmed/29548831">https://www.ncbi.nlm.nih.gov/pubmed/29548831</a> |
| Registry                                                                      | marginal zone lymphoma                | Germany                                                           | <a href="https://www.ncbi.nlm.nih.gov/pubmed/28771659">https://www.ncbi.nlm.nih.gov/pubmed/28771659</a> |
| Registry                                                                      | lymphoma                              | Germany                                                           | <a href="https://www.ncbi.nlm.nih.gov/pubmed/31649129">https://www.ncbi.nlm.nih.gov/pubmed/31649129</a> |
| Transplantation (JSHCT)                                                       | ALL                                   | Japan                                                             | <a href="https://www.ncbi.nlm.nih.gov/pubmed/31002992">https://www.ncbi.nlm.nih.gov/pubmed/31002992</a> |
| Transplantation (JSHCT)                                                       | AML / HSCT                            | Japan                                                             | <a href="https://www.ncbi.nlm.nih.gov/pubmed/30718800">https://www.ncbi.nlm.nih.gov/pubmed/30718800</a> |
| Transplantation (JSHCT)                                                       | AML / HSCT                            | Japan                                                             | <a href="https://www.ncbi.nlm.nih.gov/pubmed/29959436">https://www.ncbi.nlm.nih.gov/pubmed/29959436</a> |
| Transplantation (JSHCT)                                                       | lymphoma / HSCT                       | Japan                                                             | <a href="https://www.ncbi.nlm.nih.gov/pubmed/30701466">https://www.ncbi.nlm.nih.gov/pubmed/30701466</a> |
| Transplantation (JSHCT)                                                       | JMML                                  | Japan                                                             | <a href="https://www.ncbi.nlm.nih.gov/pubmed/31790827">https://www.ncbi.nlm.nih.gov/pubmed/31790827</a> |
| Transplantation (JSHCT)                                                       | AML / ALL / HSCT                      | Japan                                                             | <a href="https://www.ncbi.nlm.nih.gov/pubmed/29795428">https://www.ncbi.nlm.nih.gov/pubmed/29795428</a> |
| Kiel Pediatric Tumor Registry                                                 | central nervous system germinomas     | Germany                                                           | <a href="https://www.ncbi.nlm.nih.gov/pubmed/29237087">https://www.ncbi.nlm.nih.gov/pubmed/29237087</a> |
| (CWS)                                                                         | Ewing sarcoma                         | Europe                                                            | <a href="https://www.ncbi.nlm.nih.gov/pubmed/31393080">https://www.ncbi.nlm.nih.gov/pubmed/31393080</a> |
| Greater Bay Area Cancer Registry                                              | DLBCL                                 | California                                                        | <a href="https://www.ncbi.nlm.nih.gov/pubmed/30511461">https://www.ncbi.nlm.nih.gov/pubmed/30511461</a> |
| Nordic Society of Pediatric Hematology and Oncology (NOPHO) leukemia registry | ALL                                   | Sweden, Norway, Denmark, Finland, Iceland, Estonia, and Lithuania | <a href="https://www.ncbi.nlm.nih.gov/pubmed/30592147">https://www.ncbi.nlm.nih.gov/pubmed/30592147</a> |
| Nordic Society of Pediatric Hematology and Oncology (NOPHO) leukemia registry | ALL                                   | Sweden, Norway, Denmark, Finland, Iceland, Estonia, and Lithuania | <a href="https://www.ncbi.nlm.nih.gov/pubmed/31674724">https://www.ncbi.nlm.nih.gov/pubmed/31674724</a> |
| California Cancer Registry                                                    | ALL                                   | California                                                        | <a href="https://www.ncbi.nlm.nih.gov/pubmed/30849003">https://www.ncbi.nlm.nih.gov/pubmed/30849003</a> |
| California Cancer Registry                                                    | ALL                                   | California                                                        | <a href="https://www.ncbi.nlm.nih.gov/pubmed/29669756">https://www.ncbi.nlm.nih.gov/pubmed/29669756</a> |
| California Cancer Registry                                                    | high-grade glioma and medulloblastoma | California                                                        | <a href="https://www.ncbi.nlm.nih.gov/pubmed/29417400">https://www.ncbi.nlm.nih.gov/pubmed/29417400</a> |

| Registry                                                                                                                                                                      | Tumor Types                                            | Geographical Areas Represented              | Citation                                                                                                |
|-------------------------------------------------------------------------------------------------------------------------------------------------------------------------------|--------------------------------------------------------|---------------------------------------------|---------------------------------------------------------------------------------------------------------|
| Canadian Thyroid Cancer Consortium Registry (CTCCR)                                                                                                                           | differentiated thyroid cancer (DTC)                    | Canada                                      | <a href="https://www.ncbi.nlm.nih.gov/pubmed/31275541">https://www.ncbi.nlm.nih.gov/pubmed/31275541</a> |
| European Rhabdoid Registry (EU-RHAB)                                                                                                                                          | spinal cord atypical teratoid/rhabdoid tumor (spATRTR) | Europe                                      | <a href="https://www.ncbi.nlm.nih.gov/pubmed/31571386">https://www.ncbi.nlm.nih.gov/pubmed/31571386</a> |
| European Rhabdoid Registry (EU-RHAB)                                                                                                                                          | atypical Teratoid Rhabdoid Tumors (ATRTR)              | Europe                                      | <a href="https://www.ncbi.nlm.nih.gov/pubmed/31883020">https://www.ncbi.nlm.nih.gov/pubmed/31883020</a> |
| European Rhabdoid Registry (EU-RHAB)                                                                                                                                          | congenital rhabdoid tumors                             | Europe                                      | <a href="https://www.ncbi.nlm.nih.gov/pubmed/29418059">https://www.ncbi.nlm.nih.gov/pubmed/29418059</a> |
| Asia-Pacific Blood and Marrow Transplantation Group Data Center, Eighteen of 21 APBMT member countries/regions reported their annual HSCT activities to the APBMT Data Center | HSCT                                                   | 18 countries throughout Asia-Pacific region | <a href="https://www.ncbi.nlm.nih.gov/pubmed/31089289">https://www.ncbi.nlm.nih.gov/pubmed/31089289</a> |
| Childhood Leukemia Study Group (Dutch Childhood Oncology Group (DCOG))                                                                                                        | AML / HSCT                                             | The Netherlands                             | <a href="https://www.ncbi.nlm.nih.gov/pubmed/30568171">https://www.ncbi.nlm.nih.gov/pubmed/30568171</a> |
| Netherlands Cancer Registry                                                                                                                                                   | malignant peripheral nerve sheath tumors               | The Netherlands                             | <a href="https://www.ncbi.nlm.nih.gov/pubmed/31760312">https://www.ncbi.nlm.nih.gov/pubmed/31760312</a> |
| Netherlands Cancer Registry                                                                                                                                                   | neuroblastoma                                          | The Netherlands                             | <a href="https://www.ncbi.nlm.nih.gov/pubmed/31726247">https://www.ncbi.nlm.nih.gov/pubmed/31726247</a> |
| Netherlands Cancer Registry                                                                                                                                                   | melanoma                                               | The Netherlands                             | <a href="https://www.ncbi.nlm.nih.gov/pubmed/29080310">https://www.ncbi.nlm.nih.gov/pubmed/29080310</a> |
| National Registry                                                                                                                                                             | ALL / HSCT                                             | Canada                                      | <a href="https://www.ncbi.nlm.nih.gov/pubmed/30769192">https://www.ncbi.nlm.nih.gov/pubmed/30769192</a> |
| National Cancer Registry of Ireland                                                                                                                                           | melanoma                                               | Ireland                                     | <a href="https://www.ncbi.nlm.nih.gov/pubmed/31101426">https://www.ncbi.nlm.nih.gov/pubmed/31101426</a> |
| Rare Brain Tumor Consortium                                                                                                                                                   | pineoblastoma                                          | international                               | <a href="https://www.ncbi.nlm.nih.gov/pubmed/31820118">https://www.ncbi.nlm.nih.gov/pubmed/31820118</a> |
| Center for International Blood and Marrow Transplant Research (CIBMTR)                                                                                                        | ALL                                                    | international                               | <a href="https://www.ncbi.nlm.nih.gov/pubmed/30808685">https://www.ncbi.nlm.nih.gov/pubmed/30808685</a> |
| Center for International Blood and Marrow Transplant Research (CIBMTR)                                                                                                        | AML / ALL / HSCT                                       | international                               | <a href="https://www.ncbi.nlm.nih.gov/pubmed/29155316">https://www.ncbi.nlm.nih.gov/pubmed/29155316</a> |
| Center for International Blood and Marrow Transplant Research (CIBMTR)                                                                                                        | ALL / HSCT                                             | international                               | <a href="https://www.ncbi.nlm.nih.gov/pubmed/28945102">https://www.ncbi.nlm.nih.gov/pubmed/28945102</a> |
| International Registry for Childhood Chronic Myeloid Leukemia (I-CML-Ped Study)                                                                                               | CML                                                    | international                               | <a href="https://www.ncbi.nlm.nih.gov/pubmed/31082688">https://www.ncbi.nlm.nih.gov/pubmed/31082688</a> |
| Australasian Bone Marrow Transplant Recipient Registry (ABMTRR)                                                                                                               | AML / HSCT                                             | Australia and New Zealand                   | <a href="https://www.ncbi.nlm.nih.gov/pubmed/31111633">https://www.ncbi.nlm.nih.gov/pubmed/31111633</a> |

| Registry                                                                                     | Tumor Types                                                            | Geographical Areas Represented   | Citation                                                                                                |
|----------------------------------------------------------------------------------------------|------------------------------------------------------------------------|----------------------------------|---------------------------------------------------------------------------------------------------------|
| International Society of Pediatric Oncology - Low-Grade Glioma [SIOP-LGG]                    | low grade glioma                                                       | international                    | <a href="https://www.ncbi.nlm.nih.gov/pubmed/31772664">https://www.ncbi.nlm.nih.gov/pubmed/31772664</a> |
| 5 provincial population-based Thai registries                                                | all pediatric cancer                                                   | Thailand                         | <a href="https://www.ncbi.nlm.nih.gov/pubmed/30168253">https://www.ncbi.nlm.nih.gov/pubmed/30168253</a> |
| 11 Spanish population-based cancer registries participating in the PITTI and ADOLCAN studies | lymphoma                                                               | Spain                            | <a href="https://www.ncbi.nlm.nih.gov/pubmed/29623582">https://www.ncbi.nlm.nih.gov/pubmed/29623582</a> |
| Denmark, Sweden, Norway, Finland national registries                                         | all pediatric cancer                                                   | Denmark, Sweden, Norway, Finland | <a href="https://www.ncbi.nlm.nih.gov/pubmed/31719686">https://www.ncbi.nlm.nih.gov/pubmed/31719686</a> |
| national cancer registries from 77 countries                                                 | all pediatric cancer                                                   | International                    | <a href="https://www.ncbi.nlm.nih.gov/pubmed/30824204">https://www.ncbi.nlm.nih.gov/pubmed/30824204</a> |
| <b>Survivorship</b>                                                                          |                                                                        |                                  |                                                                                                         |
| Finnish Cancer Registry                                                                      | suicide and risky health behaviors after pediatric cancer              | Finland                          | <a href="https://www.ncbi.nlm.nih.gov/pubmed/31287570">https://www.ncbi.nlm.nih.gov/pubmed/31287570</a> |
| Finnish Cancer Registry                                                                      | SPMs in pediatric brain cancer survivors                               | Finland                          | <a href="https://www.ncbi.nlm.nih.gov/pubmed/31063432">https://www.ncbi.nlm.nih.gov/pubmed/31063432</a> |
| Swedish National Cancer Registry                                                             | survey methodologies in pediatric cancer survivors                     | Sweden                           | <a href="https://www.ncbi.nlm.nih.gov/pubmed/30850139">https://www.ncbi.nlm.nih.gov/pubmed/30850139</a> |
| Australian Childhood Cancer Registry                                                         | t-AML in pediatric cancer survivors                                    | Australia                        | <a href="https://www.ncbi.nlm.nih.gov/pubmed/30183136">https://www.ncbi.nlm.nih.gov/pubmed/30183136</a> |
| Queensland Cancer Registry                                                                   | cardiotoxicity in pediatric blood cancers survivors                    | Australia                        | <a href="https://www.ncbi.nlm.nih.gov/pubmed/29024474">https://www.ncbi.nlm.nih.gov/pubmed/29024474</a> |
| Cancer Registry of Norway                                                                    | quality of life in pediatric cancer survivors                          | Norway                           | <a href="https://www.ncbi.nlm.nih.gov/pubmed/29090422">https://www.ncbi.nlm.nih.gov/pubmed/29090422</a> |
| PanCareSurFup: pooled data from 13 cancer registries and hospitals in 12 European countries  | SPMs, cardiac disease and late mortality in pediatric cancer survivors | Europe                           | <a href="https://www.ncbi.nlm.nih.gov/pubmed/30286417">https://www.ncbi.nlm.nih.gov/pubmed/30286417</a> |
| PanCareSurFup: pooled data from 13 cancer registries and hospitals in 12 European countries  | SPMs, cardiac disease and late mortality in pediatric cancer survivors | Europe                           | <a href="https://www.ncbi.nlm.nih.gov/pubmed/29497894">https://www.ncbi.nlm.nih.gov/pubmed/29497894</a> |
| PanCareSurFup: pooled data from 13 cancer registries and hospitals in 12 European countries  | SPMs, cardiac disease and late mortality in pediatric cancer survivors | Europe                           | <a href="https://www.ncbi.nlm.nih.gov/pubmed/31260818">https://www.ncbi.nlm.nih.gov/pubmed/31260818</a> |

| Registry                                                                                                   | Tumor Types                                                                  | Geographical Areas Represented               | Citation                                                                                                |
|------------------------------------------------------------------------------------------------------------|------------------------------------------------------------------------------|----------------------------------------------|---------------------------------------------------------------------------------------------------------|
| PanCareSurFup: pooled data from 13 cancer registries and hospitals in 12 European countries                | SPMs, cardiac disease and late mortality in pediatric cancer survivors       | Europe                                       | <a href="https://www.ncbi.nlm.nih.gov/pubmed/29165710">https://www.ncbi.nlm.nih.gov/pubmed/29165710</a> |
| Korea Central Cancer Registry                                                                              | SPMs in pediatric cancer survivors                                           | Korea                                        | <a href="https://www.ncbi.nlm.nih.gov/pubmed/30440007">https://www.ncbi.nlm.nih.gov/pubmed/30440007</a> |
| Utah Cancer Registry                                                                                       | follow-up provider preference in pediatric cancer survivors                  | Utah                                         | <a href="https://www.ncbi.nlm.nih.gov/pubmed/29346008">https://www.ncbi.nlm.nih.gov/pubmed/29346008</a> |
| PanCareLIFE                                                                                                | fertility in female pediatric cancer survivors                               | Europe                                       | <a href="https://www.ncbi.nlm.nih.gov/pubmed/30215599">https://www.ncbi.nlm.nih.gov/pubmed/30215599</a> |
| German Childhood Cancer Registry                                                                           | quality of life in pediatric brain tumor survivors                           | Germany                                      | <a href="https://www.ncbi.nlm.nih.gov/pubmed/30793186">https://www.ncbi.nlm.nih.gov/pubmed/30793186</a> |
| German Childhood Cancer Registry                                                                           | distress in pediatric cancer survivors                                       | Germany                                      | <a href="https://www.ncbi.nlm.nih.gov/pubmed/30838816">https://www.ncbi.nlm.nih.gov/pubmed/30838816</a> |
| German Childhood Cancer Registry                                                                           | CVD in pediatric cancer survivors                                            | Germany                                      | <a href="https://www.ncbi.nlm.nih.gov/pubmed/29534171">https://www.ncbi.nlm.nih.gov/pubmed/29534171</a> |
| California Cancer Registry                                                                                 | improving follow up for pediatric cancer survivors                           | California                                   | <a href="https://www.ncbi.nlm.nih.gov/pubmed/30222486">https://www.ncbi.nlm.nih.gov/pubmed/30222486</a> |
| California Cancer Registry                                                                                 | CVD in pediatric cancer survivors                                            | California                                   | <a href="https://www.ncbi.nlm.nih.gov/pubmed/29427203">https://www.ncbi.nlm.nih.gov/pubmed/29427203</a> |
| Pediatric Oncology Group of Ontario's Networked Information System, a provincial pediatric cancer registry | mental health outcomes in mothers and siblings of pediatric cancer survivors | Canada                                       | <a href="https://www.ncbi.nlm.nih.gov/pubmed/31714869">https://www.ncbi.nlm.nih.gov/pubmed/31714869</a> |
| Adult Life after Childhood Cancer in Scandinavia (ALiCCS)                                                  | neuro disorders in pediatric brain cancer survivors                          | Denmark, Finland, Iceland, Norway and Sweden | <a href="https://www.ncbi.nlm.nih.gov/pubmed/29850875">https://www.ncbi.nlm.nih.gov/pubmed/29850875</a> |
| Adult Life after Childhood Cancer in Scandinavia (ALiCCS)                                                  | neuro disorders in pediatric brain cancer survivors                          | Denmark, Finland, Iceland, Norway and Sweden | <a href="https://www.ncbi.nlm.nih.gov/pubmed/31591921">https://www.ncbi.nlm.nih.gov/pubmed/31591921</a> |
| Adult Life after Childhood Cancer in Scandinavia (ALiCCS)                                                  | neuro disorders in pediatric non-brain cancer survivors                      | Denmark, Finland, Iceland, Norway and Sweden | <a href="https://www.ncbi.nlm.nih.gov/pubmed/30980681">https://www.ncbi.nlm.nih.gov/pubmed/30980681</a> |
| Adult Life after Childhood Cancer in Scandinavia (ALiCCS)                                                  | hyperthyroidism in pediatric cancer survivors                                | Denmark, Finland, Iceland, Norway and Sweden | <a href="https://www.ncbi.nlm.nih.gov/pubmed/30585514">https://www.ncbi.nlm.nih.gov/pubmed/30585514</a> |
| Adult Life after Childhood Cancer in Scandinavia (ALiCCS)                                                  | somatic late effects in pediatric neuroblastoma survivors                    | Denmark, Finland, Iceland, Norway and Sweden | <a href="https://www.ncbi.nlm.nih.gov/pubmed/29926896">https://www.ncbi.nlm.nih.gov/pubmed/29926896</a> |

| Registry                                                  | Tumor Types                                                                   | Geographical Areas Represented | Citation                                                                                                |
|-----------------------------------------------------------|-------------------------------------------------------------------------------|--------------------------------|---------------------------------------------------------------------------------------------------------|
| Adult Life after Childhood Cancer in Scandinavia (ALiCCS) | liver disease in pediatric cancer survivors                                   |                                | <a href="https://www.ncbi.nlm.nih.gov/pubmed/29023764">https://www.ncbi.nlm.nih.gov/pubmed/29023764</a> |
| International DIPG Registry                               | risk of DIPG after radiation for medulloblastoma in medulloblastoma survivors | International                  | <a href="https://www.ncbi.nlm.nih.gov/pubmed/30049282">https://www.ncbi.nlm.nih.gov/pubmed/30049282</a> |
| Cancer Registry Zurich and Zug                            | information needs in pediatric cancer survivors                               | Switzerland                    | <a href="https://www.ncbi.nlm.nih.gov/pubmed/30051513">https://www.ncbi.nlm.nih.gov/pubmed/30051513</a> |
| Swiss Childhood Cancer Registry                           | support needs of parents of pediatric cancer survivors                        | Switzerland                    | <a href="https://www.ncbi.nlm.nih.gov/pubmed/31090217">https://www.ncbi.nlm.nih.gov/pubmed/31090217</a> |
| Swiss Childhood Cancer Registry                           | ototoxicity in pediatric cancer survivors                                     | Switzerland                    | <a href="https://www.ncbi.nlm.nih.gov/pubmed/29230928">https://www.ncbi.nlm.nih.gov/pubmed/29230928</a> |
| Swiss Childhood Cancer Registry                           | pulmonary toxicity in pediatric cancer survivors                              | Switzerland                    | <a href="https://www.ncbi.nlm.nih.gov/pubmed/29905401">https://www.ncbi.nlm.nih.gov/pubmed/29905401</a> |
| Swiss Childhood Cancer Registry                           | pulmonary toxicity in pediatric cancer survivors                              | Switzerland                    | <a href="https://www.ncbi.nlm.nih.gov/pubmed/28868646">https://www.ncbi.nlm.nih.gov/pubmed/28868646</a> |
| Swiss Childhood Cancer Registry                           | risk of obesity in pediatric cancer survivors                                 | Switzerland                    | <a href="https://www.ncbi.nlm.nih.gov/pubmed/29381792">https://www.ncbi.nlm.nih.gov/pubmed/29381792</a> |
| Swiss Childhood Cancer Registry                           | parent preferences for follow-up after pediatric cancer                       | Switzerland                    | <a href="https://www.ncbi.nlm.nih.gov/pubmed/28134478">https://www.ncbi.nlm.nih.gov/pubmed/28134478</a> |
| Swiss Childhood Cancer Registry                           | physical activity and screen time in pediatric cancer survivors               | Switzerland                    | <a href="https://www.ncbi.nlm.nih.gov/pubmed/31750617">https://www.ncbi.nlm.nih.gov/pubmed/31750617</a> |
| Swiss Childhood Cancer Registry                           | risk of obesity in pediatric cancer survivors                                 | Switzerland                    | <a href="https://www.ncbi.nlm.nih.gov/pubmed/30119140">https://www.ncbi.nlm.nih.gov/pubmed/30119140</a> |
| Swiss Childhood Cancer Registry                           | hearing loss and QOL in pediatric cancer survivors                            | Switzerland                    | <a href="https://www.ncbi.nlm.nih.gov/pubmed/30306534">https://www.ncbi.nlm.nih.gov/pubmed/30306534</a> |
| Swiss Childhood Cancer Registry                           | smoking in pediatric cancer survivors                                         | Switzerland                    | <a href="https://www.ncbi.nlm.nih.gov/pubmed/30239111">https://www.ncbi.nlm.nih.gov/pubmed/30239111</a> |
| Swiss Childhood Cancer Registry                           | communication with pediatric cancer survivors                                 | Switzerland                    | <a href="https://www.ncbi.nlm.nih.gov/pubmed/30729685">https://www.ncbi.nlm.nih.gov/pubmed/30729685</a> |
| Swedish Childhood Cancer Registry                         | school performance in pediatric cancer survivors                              | Sweden                         | <a href="https://www.ncbi.nlm.nih.gov/pubmed/31595683">https://www.ncbi.nlm.nih.gov/pubmed/31595683</a> |



| Registry                                                                        | Tumor Types                                                                                                                                                                   | Geographical Areas Represented           | Citation                                                                                                |
|---------------------------------------------------------------------------------|-------------------------------------------------------------------------------------------------------------------------------------------------------------------------------|------------------------------------------|---------------------------------------------------------------------------------------------------------|
| Swedish Childhood Cancer Registry                                               | Study protocol for a feasibility study of an internet-administered, guided, CBT-based, self-help intervention (ENGAGE) for parents of children previously treated for cancer. | Sweden                                   | <a href="https://www.ncbi.nlm.nih.gov/pubmed/29903802">https://www.ncbi.nlm.nih.gov/pubmed/29903802</a> |
| Danish Registry of Childhood Cancer                                             | SPMs in pediatric head and neck cancer survivors                                                                                                                              | Denmark                                  | <a href="https://www.ncbi.nlm.nih.gov/pubmed/31472358">https://www.ncbi.nlm.nih.gov/pubmed/31472358</a> |
| Japanese Data Center for Hematopoietic Cell Transplantation                     | follow-up after HSCT in pediatric cancer survivors                                                                                                                            | Japan                                    | <a href="https://www.ncbi.nlm.nih.gov/pubmed/30728138">https://www.ncbi.nlm.nih.gov/pubmed/30728138</a> |
| Denmark, Finland, Iceland, and Sweden national registries                       | hospitalization in pediatric hepatoblastoma survivors                                                                                                                         | Denmark, Finland, Iceland, and Sweden    | <a href="https://www.ncbi.nlm.nih.gov/pubmed/30557167">https://www.ncbi.nlm.nih.gov/pubmed/30557167</a> |
| Group—Long-Term Effects After Childhood Cancer)                                 | CVD in pediatric cancer survivors                                                                                                                                             | The Netherlands                          | <a href="https://www.ncbi.nlm.nih.gov/pubmed/30595059">https://www.ncbi.nlm.nih.gov/pubmed/30595059</a> |
| California Cancer Registry                                                      | medical comorbidities and health care utilization in pediatric cancer survivors                                                                                               | California                               | <a href="https://www.ncbi.nlm.nih.gov/pubmed/29654427">https://www.ncbi.nlm.nih.gov/pubmed/29654427</a> |
| Childhood Cancer Registry of the Rhône-Alpes Region                             | psychiatric comorbidities in pediatric cancer survivors                                                                                                                       | Rhône-Alpes region of France             | <a href="https://www.ncbi.nlm.nih.gov/pubmed/31660778">https://www.ncbi.nlm.nih.gov/pubmed/31660778</a> |
| Childhood Cancer Registry of the Rhône-Alpes Region                             | severe late effects after TBI for HSCT for leukemia in pediatric survivors                                                                                                    | Rhône-Alpes region of France             | <a href="https://www.ncbi.nlm.nih.gov/pubmed/30978121">https://www.ncbi.nlm.nih.gov/pubmed/30978121</a> |
| Childhood Cancer Registry of the Rhône-Alpes Region                             | dysautonomia in pediatric cancer survivors                                                                                                                                    | Rhône-Alpes region of France             | <a href="https://www.ncbi.nlm.nih.gov/pubmed/30136876">https://www.ncbi.nlm.nih.gov/pubmed/30136876</a> |
| <b>Genomics</b>                                                                 |                                                                                                                                                                               |                                          |                                                                                                         |
| PanCareLIFE                                                                     | ototoxicity in pediatric cancer                                                                                                                                               | Europe                                   | <a href="https://www.ncbi.nlm.nih.gov/pubmed/31666714">https://www.ncbi.nlm.nih.gov/pubmed/31666714</a> |
| PanCareLIFE                                                                     | gonadal dysfunction in pediatric cancer                                                                                                                                       | Europe                                   | <a href="https://www.ncbi.nlm.nih.gov/pubmed/30257669">https://www.ncbi.nlm.nih.gov/pubmed/30257669</a> |
| Individualised Therapy For Relapsed Malignancies In Childhood (INFORM) Registry | diffuse intrinsic pontine glioma                                                                                                                                              | Germany                                  | <a href="https://www.ncbi.nlm.nih.gov/pubmed/31022591">https://www.ncbi.nlm.nih.gov/pubmed/31022591</a> |
| Kiel Pediatric Tumor Registry                                                   | germ cell tumors                                                                                                                                                              | Germany                                  | <a href="https://www.ncbi.nlm.nih.gov/pubmed/31045322">https://www.ncbi.nlm.nih.gov/pubmed/31045322</a> |
| CEFALO                                                                          | brain tumors                                                                                                                                                                  | Sweden, Denmark, Norway, and Switzerland | <a href="https://www.ncbi.nlm.nih.gov/pubmed/31792337">https://www.ncbi.nlm.nih.gov/pubmed/31792337</a> |

| Registry                                                                                                                                    | Tumor Types                                   | Geographical Areas Represented | Citation                                                                                                |
|---------------------------------------------------------------------------------------------------------------------------------------------|-----------------------------------------------|--------------------------------|---------------------------------------------------------------------------------------------------------|
| Italian Association of Pediatric Hematology and Oncology Registry                                                                           | Infantile inflammatory myofibroblastic tumors | United States and Italy        | <a href="https://www.ncbi.nlm.nih.gov/pubmed/31690781">https://www.ncbi.nlm.nih.gov/pubmed/31690781</a> |
| CWS-SoTiSaR                                                                                                                                 | alveolar subtype of rhabdomyosarcoma          | Europe                         | <a href="https://www.ncbi.nlm.nih.gov/pubmed/29468306">https://www.ncbi.nlm.nih.gov/pubmed/29468306</a> |
| HIT-HGG registry                                                                                                                            | High Grade Glioma                             | Germany                        | <a href="https://www.ncbi.nlm.nih.gov/pubmed/29016894">https://www.ncbi.nlm.nih.gov/pubmed/29016894</a> |
| International Cancer Genome Consortium [ICGC] PedBrain, Medulloblastoma Advanced Genomics International Consortium [MAGIC], and CEFALO      | medulloblastoma                               | international                  | <a href="https://www.ncbi.nlm.nih.gov/pubmed/29753700">https://www.ncbi.nlm.nih.gov/pubmed/29753700</a> |
| International Society of Pediatric Oncology (SIOP) and Gesellschaft für Pädiatrische Onkologie und Hämatologie (GPOH) nephroblastoma trials | congenital mesoblastic nephroma               | international                  | <a href="https://www.ncbi.nlm.nih.gov/pubmed/29286563">https://www.ncbi.nlm.nih.gov/pubmed/29286563</a> |
| International PPB/DICER1 Registry                                                                                                           | DICER1 associated pediatric cancers           | international                  | <a href="https://www.ncbi.nlm.nih.gov/pubmed/30672147">https://www.ncbi.nlm.nih.gov/pubmed/30672147</a> |
| European Rhabdoid Registry (EU-RHAB)                                                                                                        | rhabdoid tumors                               | Europe                         | <a href="https://www.ncbi.nlm.nih.gov/pubmed/29706634">https://www.ncbi.nlm.nih.gov/pubmed/29706634</a> |
| European Rhabdoid Registry (EU-RHAB)                                                                                                        | atypical teratoid/rhabdoid tumours            | Europe                         | <a href="https://www.ncbi.nlm.nih.gov/pubmed/31077608">https://www.ncbi.nlm.nih.gov/pubmed/31077608</a> |
| DATASUS                                                                                                                                     | pediatric adrenocortical carcinoma            | Brazil                         | <a href="https://www.ncbi.nlm.nih.gov/pubmed/31744167">https://www.ncbi.nlm.nih.gov/pubmed/31744167</a> |
| <b>New Registry Description</b>                                                                                                             |                                               |                                |                                                                                                         |
| SIOP UMBRELLA database                                                                                                                      | Wilm's tumor                                  | international                  | <a href="https://www.ncbi.nlm.nih.gov/pubmed/30310143">https://www.ncbi.nlm.nih.gov/pubmed/30310143</a> |
| BORISS registry                                                                                                                             | all pediatric cancer                          | Southern Sweden                | <a href="https://www.ncbi.nlm.nih.gov/pubmed/30191362">https://www.ncbi.nlm.nih.gov/pubmed/30191362</a> |
| VIGICANCER                                                                                                                                  | all pediatric cancer                          | Colombia                       | <a href="https://www.ncbi.nlm.nih.gov/pubmed/30241253">https://www.ncbi.nlm.nih.gov/pubmed/30241253</a> |
| Pediatric Proton Consortium Registry                                                                                                        | all pediatric cancer                          | United States                  | <a href="https://www.ncbi.nlm.nih.gov/pubmed/29881715">https://www.ncbi.nlm.nih.gov/pubmed/29881715</a> |
| Pediatric Proton/Photon Consortium Registry                                                                                                 | pediatric cancer                              | international                  | <a href="https://www.ncbi.nlm.nih.gov/pubmed/31600082">https://www.ncbi.nlm.nih.gov/pubmed/31600082</a> |
| subgroup                                                                                                                                    | all pediatric cancer                          | Switzerland                    | <a href="https://www.ncbi.nlm.nih.gov/pubmed/31738177">https://www.ncbi.nlm.nih.gov/pubmed/31738177</a> |
| establishment of a Caribbean cancer registry hub                                                                                            | all pediatric cancer                          | Caribbean                      | <a href="https://www.ncbi.nlm.nih.gov/pubmed/31395471">https://www.ncbi.nlm.nih.gov/pubmed/31395471</a> |
| Australia Cardio-Oncology Registry (ACOR)                                                                                                   | all pediatric cancer                          | Australia and New Zealand      | <a href="https://www.ncbi.nlm.nih.gov/pubmed/31841257">https://www.ncbi.nlm.nih.gov/pubmed/31841257</a> |
| <b>Harmonization</b>                                                                                                                        |                                               |                                |                                                                                                         |
| New Zealand Cancer Registry (NZCR) and the New Zealand Children's Cancer Registry (NZCCR)                                                   | all pediatric cancer                          | New Zealand                    | <a href="https://www.ncbi.nlm.nih.gov/pubmed/29902672">https://www.ncbi.nlm.nih.gov/pubmed/29902672</a> |
| EBMT registry                                                                                                                               | all pediatric cancer                          | EU                             | <a href="https://www.ncbi.nlm.nih.gov/pubmed/31636397">https://www.ncbi.nlm.nih.gov/pubmed/31636397</a> |
| multiple international registries                                                                                                           | all pediatric cancer                          | international                  | <a href="https://www.ncbi.nlm.nih.gov/pubmed/31136799">https://www.ncbi.nlm.nih.gov/pubmed/31136799</a> |

| <b>Registry</b>                                                                                    | <b>Tumor Types</b>                  | <b>Geographical Areas Represented</b> | <b>Citation</b>                                                                                         |
|----------------------------------------------------------------------------------------------------|-------------------------------------|---------------------------------------|---------------------------------------------------------------------------------------------------------|
| Finnish Cancer Registry                                                                            | all pediatric cancer                | Finland                               | <a href="https://www.ncbi.nlm.nih.gov/pubmed/31290361">https://www.ncbi.nlm.nih.gov/pubmed/31290361</a> |
| Palermo Province Cancer Registry                                                                   | all pediatric cancer                | Italy                                 | <a href="https://www.ncbi.nlm.nih.gov/pubmed/29949937">https://www.ncbi.nlm.nih.gov/pubmed/29949937</a> |
| Pediatric Oncology Group of Ontario Networked Information System (POGONIS)                         | all pediatric cancer                | Canada                                | <a href="https://www.ncbi.nlm.nih.gov/pubmed/29356606">https://www.ncbi.nlm.nih.gov/pubmed/29356606</a> |
| Swiss Childhood Cancer Registry                                                                    | all pediatric cancer                | Switzerland                           | <a href="https://www.ncbi.nlm.nih.gov/pubmed/29544999">https://www.ncbi.nlm.nih.gov/pubmed/29544999</a> |
| Associazione Italiana Ematologia Oncologia Pediatrica (AIEOP)                                      | all pediatric cancer                | Italy                                 | <a href="https://www.ncbi.nlm.nih.gov/pubmed/31747324">https://www.ncbi.nlm.nih.gov/pubmed/31747324</a> |
| AYA HOPE                                                                                           | all pediatric cancer                | United States                         | <a href="https://www.ncbi.nlm.nih.gov/pubmed/30294882">https://www.ncbi.nlm.nih.gov/pubmed/30294882</a> |
| North Carolina Central Cancer Registry and the Kaiser Permanente Southern California Health System | all pediatric cancer                | United States                         | <a href="https://www.ncbi.nlm.nih.gov/pubmed/31545129">https://www.ncbi.nlm.nih.gov/pubmed/31545129</a> |
| <b>Radiology</b>                                                                                   |                                     |                                       |                                                                                                         |
| EU-RHAB                                                                                            | tumor                               | European                              | <a href="https://www.ncbi.nlm.nih.gov/pubmed/30010851">https://www.ncbi.nlm.nih.gov/pubmed/30010851</a> |
| CWS-SoTiSaR                                                                                        | alveolar rhabdomyosarcoma           | European                              | <a href="https://www.ncbi.nlm.nih.gov/pubmed/29368010">https://www.ncbi.nlm.nih.gov/pubmed/29368010</a> |
| Finnish Cancer Registry                                                                            | leukemia                            | Finland                               | <a href="https://www.ncbi.nlm.nih.gov/pubmed/29976736">https://www.ncbi.nlm.nih.gov/pubmed/29976736</a> |
| Pediatric Proton Consortium Registry                                                               | pediatric cancer                    | international                         | <a href="https://www.ncbi.nlm.nih.gov/pubmed/30505881">https://www.ncbi.nlm.nih.gov/pubmed/30505881</a> |
| <b>Consensus Guidelines</b>                                                                        |                                     |                                       |                                                                                                         |
| Liver Hemangioma Registry                                                                          | hemangioma                          | United States                         | <a href="https://www.ncbi.nlm.nih.gov/pubmed/30244993">https://www.ncbi.nlm.nih.gov/pubmed/30244993</a> |
| International PPB Registry                                                                         | DICER1 associated pediatric cancers | international                         | <a href="https://www.ncbi.nlm.nih.gov/pubmed/29343557">https://www.ncbi.nlm.nih.gov/pubmed/29343557</a> |
| <b>Hereditary Pediatric Cancer Syndromes</b>                                                       |                                     |                                       |                                                                                                         |
| Finnish Cancer Registry                                                                            | pediatric cancers in NF-1           | Finland                               | <a href="https://www.ncbi.nlm.nih.gov/pubmed/30724342">https://www.ncbi.nlm.nih.gov/pubmed/30724342</a> |
| multiple international registries                                                                  | pediatrics cancers in MEN 2B        | international                         | <a href="https://www.ncbi.nlm.nih.gov/pubmed/30660595">https://www.ncbi.nlm.nih.gov/pubmed/30660595</a> |
| <b>Electronic Health Records</b>                                                                   |                                     |                                       |                                                                                                         |
| PEDSnet                                                                                            | leukemia and lymphoma               | United States                         | <a href="https://www.ncbi.nlm.nih.gov/pubmed/31207054">https://www.ncbi.nlm.nih.gov/pubmed/31207054</a> |
| <b>Prospective Clinical Trials</b>                                                                 |                                     |                                       |                                                                                                         |
| 30 institutions in Japan                                                                           | medulloblastoma                     | Japan                                 | <a href="https://www.ncbi.nlm.nih.gov/pubmed/31544362">https://www.ncbi.nlm.nih.gov/pubmed/31544362</a> |
